# Supplementary material
Source: PubMed Central journal article supplement (PMC5180362)
Supplement: NIHMS836621-supplement-prime_Site_2_out.pdf [file NIHMS836621-supplement-prime_Site_2_out.pdf]

| title                                            | r_psp_MMGBSA_dG_Bind | r_psp_MMGBSA_dG_Bind(NS) | r_psp_MMGBSA_dG_Bind_Hbond |
|--------------------------------------------------|----------------------|--------------------------|----------------------------|
| site2_3186499_cap_syp_3-out (full system)_ligand | -71.8                | -88.4                    | -3.7                       |

| r_psp_MMGBSA_dG_Bind_Coulomb | r_psp_MMGBSA_dG_Bind_Covalent | r_psp_MMGBSA_dG_Bind_Packing | r_psp_MMGBSA_dG_Bind_Lipo |
|------------------------------|-------------------------------|------------------------------|---------------------------|
| -56.5                        | -2.8                          | -1.0                         | -32.1                     |

|                              |                          |                               |                        |
|------------------------------|--------------------------|-------------------------------|------------------------|
| r_psp_MMGBSA_dG_Bind_Solv_GB | r_psp_MMGBSA_dG_Bind_vdW | r_psp_MMGBSA_dG_Bind_SelfCont | r_psp_Lig_Strain_Hbond |
| 54.0                         | -29.6                    | -0.1                          | 0.0                    |

| r_psp_Lig_Strain_Coulomb | r_psp_Lig_Strain_Covalent | r_psp_Lig_Strain_Packing | r_psp_Lig_Strain_Lipo | r_psp_Lig_Strain_Energy |
|--------------------------|---------------------------|--------------------------|-----------------------|-------------------------|
| 0.4                      | -3.6                      | 0.0                      | 7.9                   | 9.1                     |

| r_psp_Lig_Strain_Solv_GB | r_psp_Lig_Strain_vdW | r_psp_Lig_Strain_SelfCont | r_psp_Ligand_Hbond | r_psp_Ligand_Coulomb | r_psp_Ligand_Covalent |
|--------------------------|----------------------|---------------------------|--------------------|----------------------|-----------------------|
| -2.0                     | 6.6                  | 0.0                       | 0.0                | -73.7                | 9.2                   |

| r_psp_Ligand_Packing | r_psp_Ligand_Lipo | r_psp_Ligand_Energy | r_psp_Ligand_Solv_GB | r_psp_Ligand_vdW | r_psp_Ligand_SelfCont |
|----------------------|-------------------|---------------------|----------------------|------------------|-----------------------|
| 0.0                  | -13.9             | -95.0               | -24.5                | 8.0              | 0.0                   |

| r_psp_Complex_Hbond | r_psp_Complex_Coulomb | r_psp_Complex_Covalent | r_psp_Complex_Packing | r_psp_Complex_Lipo | r_psp_Complex_Energy |
|---------------------|-----------------------|------------------------|-----------------------|--------------------|----------------------|
| -111.4              | -7624.9               | 1166.3                 | -6.3                  | -1603.9            | -12105.7             |

| r_psp_Complex_Solv_GB | r_psp_Complex_vdW | r_psp_Complex_SelfCont | r_psp_Receptor_Hbond | r_psp_Receptor_Coulomb | r_psp_Receptor_Covalent |
|-----------------------|-------------------|------------------------|----------------------|------------------------|-------------------------|
| -2388.6               | -1406.6           | -130.3                 | -107.7               | -7494.7                | 1160.0                  |



| r_psp_Receptor_Packing | r_psp_Receptor_Lipo | r_psp_Receptor_Energy | r_psp_Receptor_Solv_GB | r_psp_Receptor_vdW | r_psp_Receptor_SelfCont |
|------------------------|---------------------|-----------------------|------------------------|--------------------|-------------------------|
| -5.3                   | -1557.9             | -11938.9              | -2418.2                | -1385.0            | -130.2                  |

|                                |                                  |                                   |
|--------------------------------|----------------------------------|-----------------------------------|
| r_psp_MMGBSA_dG_Bind(NS)_Hbond | r_psp_MMGBSA_dG_Bind(NS)_Coulomb | r_psp_MMGBSA_dG_Bind(NS)_Covalent |
| -4.1                           | -64.4                            | 0.0                               |

|                                  |                               |                                  |                              |
|----------------------------------|-------------------------------|----------------------------------|------------------------------|
| r_psp_MMGBSA_dG_Bind(NS)_Packing | r_psp_MMGBSA_dG_Bind(NS)_Lipo | r_psp_MMGBSA_dG_Bind(NS)_Solv_GB | r_psp_MMGBSA_dG_Bind(NS)_vdW |
| -0.9                             | -39.5                         | 60.3                             | -39.7                        |

|                                   |                        |                          |                           |                          |
|-----------------------------------|------------------------|--------------------------|---------------------------|--------------------------|
| r_psp_MMGBSA_dG_Bind(NS)_SelfCont | r_psp_Rec_Strain_Hbond | r_psp_Rec_Strain_Coulomb | r_psp_Rec_Strain_Covalent | r_psp_Rec_Strain_Packing |
| 0.0                               | 0.4                    | 7.6                      | 0.8                       | -0.2                     |

| r_psp_Rec_Strain_Lipo | r_psp_Rec_Strain_Energy | r_psp_Rec_Strain_Solv_GB | r_psp_Rec_Strain_vdW | r_psp_Rec_Strain_SelfCont |
|-----------------------|-------------------------|--------------------------|----------------------|---------------------------|
| -0.5                  | 7.4                     | -4.2                     | 3.6                  | -0.1                      |
