# Supplementary material
Source: PubMed Central journal article supplement (PMC5180362)
Supplement: NIHMS836621-supplement-Site_1_Occupancy.pdf [file NIHMS836621-supplement-Site_1_Occupancy.pdf]

| Positio | Site    | Compound Info | CMPD-ID  | donor             | acceptor          | occupancy |
|---------|---------|---------------|----------|-------------------|-------------------|-----------|
| T1_9    | Primary | Hit           | 7256141  | SegC2-UNK900-Main | SegC2-GLU556-Side | 171.7%    |
| T1_4    | Primary | Hit           | 3186499  | SegC2-ARG521-Side | SegC2-UNK900-Main | 84.5%     |
| T1_1    | Primary | Hit           | 15944862 | SegC2-ARG521-Side | SegC2-UNK900-Main | 73.5%     |
| T1_6    | Primary | Hit           | 3185712  | SegC2-ARG538-Main | SegC2-UNK900-Main | 50.9%     |
| T1_1    | Primary | Hit           | 15944862 | SegC2-LEU536-Main | SegC2-UNK900-Main | 50.3%     |
| T1_5    | Primary | Hit           | 5826369  | SegC2-LEU536-Main | SegC2-UNK900-Main | 48.5%     |
| T1_5    | Primary | Hit           | 5826369  | SegC2-UNK900-Main | SegC2-LYS467-Main | 42.0%     |
| T1_7    | Primary | Hit           | 1432744  | SegC2-UNK900-Main | SegC2-HIS468-Main | 32.1%     |
| T1_3    | Primary | Hit           | 5973599  | SegC2-GLY472-Main | SegC2-UNK900-Main | 31.6%     |
| T1_7    | Primary | Hit           | 1432744  | SegC2-ARG521-Side | SegC2-UNK900-Main | 30.7%     |
| T1_8    | Primary | Hit           | 1919699  | SegC2-LEU536-Main | SegC2-UNK900-Main | 29.8%     |
| T1_3    | Primary | Hit           | 5973599  | SegC2-GLY470-Main | SegC2-UNK900-Main | 29.5%     |
| T1_7    | Primary | Hit           | 1432744  | SegC2-TYR518-Side | SegC2-UNK900-Main | 27.1%     |
| T1_1    | Primary | Hit           | 15944862 | SegC2-TYR518-Side | SegC2-UNK900-Main | 24.1%     |
| T1_6    | Primary | Hit           | 3185712  | SegC2-UNK900-Main | SegC2-GLU556-Side | 21.7%     |
| T1_3    | Primary | Hit           | 5973599  | SegC2-GLN471-Main | SegC2-UNK900-Main | 20.8%     |
| T1_5    | Primary | Hit           | 5826369  | SegC2-PHE465-Main | SegC2-UNK900-Main | 20.2%     |
| T1_5    | Primary | Hit           | 5826369  | SegC2-ARG521-Side | SegC2-UNK900-Main | 19.4%     |
| T1_1    | Primary | Hit           | 15944862 | SegC2-UNK900-Main | SegC2-HIS468-Main | 18.8%     |
| T1_4    | Primary | Hit           | 3186499  | SegC2-UNK900-Main | SegC2-LYS467-Main | 17.3%     |
| T1_3    | Primary | Hit           | 5973599  | SegC2-UNK900-Main | SegC2-HIS468-Main | 16.4%     |
| T1_9    | Primary | Hit           | 7256141  | SegC2-GLY470-Main | SegC2-UNK900-Main | 15.8%     |
| T1_10   | Primary | Hit           | 3185717  | SegC2-UNK900-Main | SegC2-GLN471-Main | 14.9%     |
| T1_3    | Primary | Hit           | 5973599  | SegC2-ARG522-Side | SegC2-UNK900-Main | 13.4%     |
| T1_3    | Primary | Hit           | 5973599  | SegC2-LYS467-Side | SegC2-UNK900-Main | 13.1%     |
| T1_6    | Primary | Hit           | 3185712  | SegC2-LEU536-Main | SegC2-UNK900-Main | 13.1%     |
| T1_11   | Primary | Hit           | 1452563  | SegC2-UNK900-Main | SegC2-PHE465-Main | 13.1%     |
| T1_9    | Primary | Hit           | 7256141  | SegC2-UNK900-Main | SegC2-LYS467-Main | 12.5%     |
| T1_6    | Primary | Hit           | 3185712  | SegC2-UNK900-Main | SegC2-LEU536-Main | 11.6%     |
| T1_9    | Primary | Hit           | 7256141  | SegC2-UNK900-Main | SegC2-ARG522-Side | 11.6%     |
| T1_12   | Primary | Hit           | 1107365  | SegC2-LEU536-Main | SegC2-UNK900-Side | 10.1%     |
| T1_3    | Primary | Hit           | 5973599  | SegC2-UNK900-Main | SegC2-GLY472-Main | 9.8%      |
| T1_7    | Primary | Hit           | 1432744  | SegC2-GLY470-Main | SegC2-UNK900-Main | 9.8%      |
| T1_12   | Primary | Hit           | 1107365  | SegC2-ARG521-Side | SegC2-UNK900-Main | 9.5%      |
| T1_11   | Primary | Hit           | 1452563  | SegC2-UNK900-Main | SegC2-ARG469-Main | 8.0%      |
| T1_3    | Primary | Hit           | 5973599  | SegC2-UNK900-Main | SegC2-UNK900-Main | 7.7%      |
| T1_1    | Primary | Hit           | 15944862 | SegC2-UNK900-Main | SegC2-ARG469-Side | 7.4%      |
| T1_4    | Primary | Hit           | 3186499  | SegC2-ARG522-Side | SegC2-UNK900-Main | 7.1%      |
| T1_4    | Primary | Hit           | 3186499  | SegC2-TYR518-Side | SegC2-UNK900-Main | 6.9%      |
| T1_2    | Primary | Hit           | 3167530  | SegC2-TYR518-Side | SegC2-UNK900-Main | 6.6%      |
| T1_3    | Primary | Hit           | 5973599  | SegC2-UNK900-Main | SegC2-ARG469-Side | 6.6%      |
| T1_10   | Primary | Hit           | 3185717  | SegC2-LEU536-Main | SegC2-UNK900-Main | 6.6%      |
| T1_12   | Primary | Hit           | 1107365  | SegC2-UNK900-Main | SegC2-LEU536-Main | 6.6%      |
| T1_12   | Primary | Hit           | 1107365  | SegC2-UNK900-Main | SegC2-TRP464-Side | 6.0%      |
| T1_5    | Primary | Hit           | 5826369  | SegC2-UNK900-Main | SegC2-HIS468-Main | 5.7%      |
| T1_2    | Primary | Hit           | 3167530  | SegC2-ARG521-Side | SegC2-UNK900-Main | 5.4%      |

| Positio | Site    | Compound Info | CMPD-ID  | donor             | acceptor          | occupancy |
|---------|---------|---------------|----------|-------------------|-------------------|-----------|
| T1_8    | Primary | Hit           | 1919699  | SegC2-ARG521-Side | SegC2-UNK900-Main | 5.4%      |
| T1_9    | Primary | Hit           | 7256141  | SegC2-TYR518-Side | SegC2-UNK900-Main | 5.4%      |
| T1_10   | Primary | Hit           | 3185717  | SegC2-UNK900-Main | SegC2-UNK900-Main | 5.4%      |
| T1_2    | Primary | Hit           | 3167530  | SegC2-LEU536-Main | SegC2-UNK900-Main | 4.8%      |
| T1_2    | Primary | Hit           | 3167530  | SegC2-UNK900-Main | SegC2-ARG469-Side | 4.2%      |
| T1_3    | Primary | Hit           | 5973599  | SegC2-ARG521-Side | SegC2-UNK900-Main | 4.2%      |
| T1_5    | Primary | Hit           | 5826369  | SegC2-LYS467-Main | SegC2-UNK900-Main | 4.2%      |
| T1_6    | Primary | Hit           | 3185712  | SegC2-UNK900-Main | SegC2-PRO535-Side | 4.2%      |
| T1_8    | Primary | Hit           | 1919699  | SegC2-UNK900-Main | SegC2-ARG469-Side | 4.2%      |
| T1_10   | Primary | Hit           | 3185717  | SegC2-UNK900-Main | SegC2-LEU536-Main | 4.2%      |
| T1_1    | Primary | Hit           | 15944862 | SegC2-UNK900-Main | SegC2-GLU556-Side | 3.9%      |
| T1_12   | Primary | Hit           | 1107365  | SegC2-PHE465-Main | SegC2-UNK900-Main | 3.9%      |
| T1_5    | Primary | Hit           | 5826369  | SegC2-LYS514-Side | SegC2-UNK900-Main | 3.6%      |
| T1_7    | Primary | Hit           | 1432744  | SegC2-UNK900-Main | SegC2-ARG469-Side | 3.6%      |
| T1_8    | Primary | Hit           | 1919699  | SegC2-LEU536-Side | SegC2-UNK900-Main | 3.6%      |
| T1_5    | Primary | Hit           | 5826369  | SegC2-TYR518-Side | SegC2-UNK900-Main | 3.3%      |
| T1_10   | Primary | Hit           | 3185717  | SegC2-UNK900-Main | SegC2-ARG538-Side | 3.3%      |
| T1_11   | Primary | Hit           | 1452563  | SegC2-UNK900-Main | SegC2-GLN471-Main | 3.3%      |
| T1_12   | Primary | Hit           | 1107365  | SegC2-LEU536-Main | SegC2-UNK900-Main | 3.3%      |
| T1_1    | Primary | Hit           | 15944862 | SegC2-LEU536-Side | SegC2-UNK900-Main | 3.0%      |
| T1_5    | Primary | Hit           | 5826369  | SegC2-UNK900-Main | SegC2-GLN471-Main | 3.0%      |
| T1_9    | Primary | Hit           | 7256141  | SegC2-UNK900-Main | SegC2-PHE465-Side | 3.0%      |
| T1_11   | Primary | Hit           | 1452563  | SegC2-UNK900-Main | SegC2-HIS468-Main | 3.0%      |
| T1_11   | Primary | Hit           | 1452563  | SegC2-LYS467-Side | SegC2-UNK900-Main | 3.0%      |
| T1_11   | Primary | Hit           | 1452563  | SegC2-LYS461-Main | SegC2-UNK900-Main | 3.0%      |
| T1_12   | Primary | Hit           | 1107365  | SegC2-TYR518-Side | SegC2-UNK900-Main | 3.0%      |
| T1_1    | Primary | Hit           | 15944862 | SegC2-GLY470-Main | SegC2-UNK900-Main | 2.7%      |
| T1_1    | Primary | Hit           | 15944862 | SegC2-LYS514-Side | SegC2-UNK900-Main | 2.7%      |
| T1_3    | Primary | Hit           | 5973599  | SegC2-GLY473-Main | SegC2-UNK900-Main | 2.7%      |
| T1_5    | Primary | Hit           | 5826369  | SegC2-PHE465-Side | SegC2-UNK900-Main | 2.7%      |
| T1_5    | Primary | Hit           | 5826369  | SegC2-LEU536-Side | SegC2-UNK900-Main | 2.7%      |
| T1_6    | Primary | Hit           | 3185712  | SegC2-UNK900-Main | SegC2-ARG469-Side | 2.7%      |
| T1_11   | Primary | Hit           | 1452563  | SegC2-GLY462-Main | SegC2-UNK900-Main | 2.7%      |
| T1_1    | Primary | Hit           | 15944862 | SegC2-UNK900-Main | SegC2-LYS467-Main | 2.4%      |
| T1_1    | Primary | Hit           | 15944862 | SegC2-ARG469-Side | SegC2-UNK900-Main | 2.4%      |
| T1_6    | Primary | Hit           | 3185712  | SegC2-UNK900-Main | SegC2-SER537-Side | 2.4%      |
| T1_9    | Primary | Hit           | 7256141  | SegC2-UNK900-Main | SegC2-HIS468-Main | 2.4%      |
| T1_11   | Primary | Hit           | 1452563  | SegC2-UNK900-Main | SegC2-UNK900-Main | 2.4%      |
| T1_2    | Primary | Hit           | 3167530  | SegC2-LEU536-Side | SegC2-UNK900-Main | 2.1%      |
| T1_2    | Primary | Hit           | 3167530  | SegC2-LYS514-Side | SegC2-UNK900-Main | 2.1%      |
| T1_4    | Primary | Hit           | 3186499  | SegC2-UNK900-Main | SegC2-ARG469-Side | 2.1%      |
| T1_5    | Primary | Hit           | 5826369  | SegC2-UNK900-Main | SegC2-TRP464-Side | 2.1%      |
| T1_5    | Primary | Hit           | 5826369  | SegC2-TRP464-Main | SegC2-UNK900-Main | 2.1%      |
| T1_6    | Primary | Hit           | 3185712  | SegC2-UNK900-Main | SegC2-LYS514-Main | 2.1%      |
| T1_9    | Primary | Hit           | 7256141  | SegC2-UNK900-Main | SegC2-GLY463-Main | 2.1%      |
| T1_10   | Primary | Hit           | 3185717  | SegC2-ARG538-Side | SegC2-UNK900-Main | 2.1%      |

| Positio | Site    | Compound Info | CMPD-ID  | donor             | acceptor          | occupancy |
|---------|---------|---------------|----------|-------------------|-------------------|-----------|
| T1_1    | Primary | Hit           | 15944862 | SegC2-UNK900-Main | SegC2-ARG521-Side | 1.8%      |
| T1_2    | Primary | Hit           | 3167530  | SegC2-UNK900-Main | SegC2-UNK900-Main | 1.8%      |
| T1_3    | Primary | Hit           | 5973599  | SegC2-TYR518-Side | SegC2-UNK900-Main | 1.8%      |
| T1_5    | Primary | Hit           | 5826369  | SegC2-UNK900-Main | SegC2-LEU536-Main | 1.8%      |
| T1_6    | Primary | Hit           | 3185712  | SegC2-LEU536-Side | SegC2-UNK900-Main | 1.8%      |
| T1_6    | Primary | Hit           | 3185712  | SegC2-PRO535-Side | SegC2-UNK900-Main | 1.8%      |
| T1_7    | Primary | Hit           | 1432744  | SegC2-GLN471-Main | SegC2-UNK900-Main | 1.8%      |
| T1_8    | Primary | Hit           | 1919699  | SegC2-UNK900-Main | SegC2-GLN471-Main | 1.8%      |
| T1_9    | Primary | Hit           | 7256141  | SegC2-UNK900-Main | SegC2-GLN471-Main | 1.8%      |
| T1_9    | Primary | Hit           | 7256141  | SegC2-ARG522-Side | SegC2-UNK900-Main | 1.8%      |
| T1_10   | Primary | Hit           | 3185717  | SegC2-UNK900-Main | SegC2-ILE558-Main | 1.8%      |
| T1_11   | Primary | Hit           | 1452563  | SegC2-LYS467-Main | SegC2-UNK900-Main | 1.8%      |
| T1_2    | Primary | Hit           | 3167530  | SegC2-UNK900-Main | SegC2-LEU536-Side | 1.5%      |
| T1_4    | Primary | Hit           | 3186499  | SegC2-GLY470-Main | SegC2-UNK900-Main | 1.5%      |
| T1_4    | Primary | Hit           | 3186499  | SegC2-UNK900-Main | SegC2-GLU556-Side | 1.5%      |
| T1_7    | Primary | Hit           | 1432744  | SegC2-ARG469-Side | SegC2-UNK900-Main | 1.5%      |
| T1_7    | Primary | Hit           | 1432744  | SegC2-ARG538-Side | SegC2-UNK900-Main | 1.5%      |
| T1_11   | Primary | Hit           | 1452563  | SegC2-ARG522-Side | SegC2-UNK900-Main | 1.5%      |
| T1_1    | Primary | Hit           | 15944862 | SegC2-ARG522-Side | SegC2-UNK900-Main | 1.2%      |
| T1_1    | Primary | Hit           | 15944862 | SegC2-UNK900-Main | SegC2-ARG522-Side | 1.2%      |
| T1_2    | Primary | Hit           | 3167530  | SegC2-UNK900-Main | SegC2-TYR518-Side | 1.2%      |
| T1_3    | Primary | Hit           | 5973599  | SegC2-UNK900-Main | SegC2-GLY463-Main | 1.2%      |
| T1_4    | Primary | Hit           | 3186499  | SegC2-UNK900-Main | SegC2-GLN471-Main | 1.2%      |
| T1_4    | Primary | Hit           | 3186499  | SegC2-UNK900-Main | SegC2-GLY463-Main | 1.2%      |
| T1_6    | Primary | Hit           | 3185712  | SegC2-ARG538-Side | SegC2-UNK900-Main | 1.2%      |
| T1_7    | Primary | Hit           | 1432744  | SegC2-UNK900-Main | SegC2-TYR518-Side | 1.2%      |
| T1_7    | Primary | Hit           | 1432744  | SegC2-UNK900-Main | SegC2-GLY470-Main | 1.2%      |
| T1_8    | Primary | Hit           | 1919699  | SegC2-TYR518-Side | SegC2-UNK900-Main | 1.2%      |
| T1_8    | Primary | Hit           | 1919699  | SegC2-UNK900-Main | SegC2-ARG469-Main | 1.2%      |
| T1_8    | Primary | Hit           | 1919699  | SegC2-UNK900-Main | SegC2-ARG538-Side | 1.2%      |
| T1_10   | Primary | Hit           | 3185717  | SegC2-GLY470-Main | SegC2-UNK900-Main | 1.2%      |
| T1_10   | Primary | Hit           | 3185717  | SegC2-UNK900-Main | SegC2-LYS514-Main | 1.2%      |
| T1_11   | Primary | Hit           | 1452563  | SegC2-TYR518-Side | SegC2-UNK900-Main | 1.2%      |
| T1_11   | Primary | Hit           | 1452563  | SegC2-UNK900-Main | SegC2-LYS467-Main | 1.2%      |
| T1_11   | Primary | Hit           | 1452563  | SegC2-ARG469-Side | SegC2-UNK900-Main | 1.2%      |
| T1_11   | Primary | Hit           | 1452563  | SegC2-HIS468-Side | SegC2-UNK900-Main | 1.2%      |
| T1_12   | Primary | Hit           | 1107365  | SegC2-UNK900-Main | SegC2-GLN471-Main | 1.2%      |
